***P*-Wave Charmed Mesons**

Katsuo NAKASHIMA,<sup>\*</sup> Toshiaki ITO, Yoshimitsu MATSUI,  
Shoji SAWADA and Tsuyoshi B. SUZUKI

*Department of Physics, Nagoya University, Nagoya 464-01*

(Received April 12, 1995)

We study the *P*-wave charmed meson spectroscopy. We analyze the mixing of two  $1^+$  states, the masses and decay widths of the *P*-wave charmed mesons by use of the Breit-Fermi Hamiltonian to account for the  $1/m_q$  effects. Though the possibility of the case that  $D_1(2420)$  observed by experiments belongs to the  $s_l^P=(3/2)^+$  dominant multiplet is high but not yet decisive. Therefore we also examine the case where the  $D_1(2420)$  belongs to the  $s_l^P=(1/2)^+$  dominant multiplet. For these two cases the relation between the masses and decay widths of the *P*-wave charmed mesons is obtained. When  $D_1(2420)$  is assigned into the member of the  $s_l^P=(3/2)^+$  dominant multiplet, the decay widths of unbound  $D_1$  and  $D_2^*$  become very large, which is consistent to the fact that these states are not found yet by the experiments.

**§ 1. Introduction**

Experimentally the two *P*-wave charmed mesons which are  $D_2^*(2460)$  and  $D_1(2420)$  have been observed. Recently new experimental data for the spectroscopy of these excited states are given by CLEO Collaboration<sup>5)</sup> and E687 Collaboration.<sup>6)</sup> In particular, the data of angular distribution of two decay pions from  $D_1(2420)$  are expected to bring an important information for the assignment of  $s_l^P$ .

Heavy flavored hadrons are approximately classified by use of the spin-parity of the light degrees of freedom  $s_l^P$ .<sup>10)</sup> Since  $D_2^*(2460)$  has  $J^P=2^+$ , we can assign this meson uniquely to the  $s_l^P=(3/2)^+$  state. On the other hand, there are possibilities that the  $D_1(2420)$  meson with  $J^P=1^+$  belongs to the  $s_l^P=(3/2)^+$  dominant doublet or the  $s_l^P=(1/2)^+$  dominant one. Usually  $D_1(2420)$  has been assigned to a member of the  $s_l^P=(3/2)^+$  dominant doublet since the mass and decay width of this meson are nearly equal to those of  $D_2^*(2460)$ . However we should note that experiments do not negate definitely the possibility that  $D_1(2420)$  belongs to the  $s_l^P=(1/2)^+$  dominant doublet as we discuss in § 3.

In this paper, we study the masses and decay widths of unknown *P*-wave charmed mesons for the two cases:

- Case I. The  $D_1(2420)$  belongs to the  $s_l^P=(3/2)^+$  dominant doublet, denoted by  $s_l^P \simeq (3/2)^+$ .
- Case II. The  $D_1(2420)$  belongs to the  $s_l^P=(1/2)^+$  dominant doublet, denoted by  $s_l^P \simeq (1/2)^+$ .

In the next section, we discuss the masses, decay widths and  $D_1$  mixing angle. In § 3 we analyze the angular distribution of two final pions in the  $D_1(2420)$  decay. A summary and discussion are given in § 4.

<sup>\*</sup>) Address after April 1, 1995: Software Development Center, Hitachi Ltd., Yokohama 244.

## § 2. Masses, decay widths and mixing angle of the $P$ -wave charmed mesons

By taking into account the  $1/m_Q$  corrections from the heavy quark limit, we consider in this section masses and strong decay widths of the  $P$ -wave charmed mesons and the mixing angle between two  $D_1$  mesons. In order to estimate the effects of the  $1/m_Q$  corrections, we use the Breit-Fermi Hamiltonian,<sup>7)</sup>

$$\Delta H = c_q \mathbf{L} \cdot \mathbf{S}_q + c_Q \mathbf{L} \cdot \mathbf{S}_Q + c_T [3(\mathbf{S}_q \cdot \hat{\mathbf{r}})(\mathbf{S}_Q \cdot \hat{\mathbf{r}}) - (\mathbf{S}_q \cdot \mathbf{S}_Q)]. \quad (1)$$

In Hamiltonian (1),  $\mathbf{L}$  is the angular momentum between a heavy quark  $Q$  and a light anti-quark  $\bar{q}$ ,  $\mathbf{S}_Q$  and  $\mathbf{S}_q$  are spins of heavy quark and light anti-quark, and  $\hat{\mathbf{r}}$  is the unit vector in the direction from the heavy quark to the light anti-quark. We ignore  $\mathbf{S} \cdot \mathbf{S}$  force in Eq. (1) because it affects mainly the  $S$ -wave states and not the  $P$ -wave states.

First we discuss the two  $D_1$  meson mixing due to the  $\mathbf{L} \cdot \mathbf{S}$  force which causes the mixing between  $s_l^P = (3/2)^+$  and  $s_l^P = (1/2)^+$  states. We shall call the lower-mass eigenstate  $D_1^\alpha$  and the higher-mass one  $D_1^\beta$  for physical  $J^P = 1^+$  mesons. Since we assume that mesons in the  $s_l^P \simeq (3/2)^+$  doublet are heavier than those in the  $s_l^P \simeq (1/2)^+$  doublet, we may assign  $D_1^\alpha$  into  $s_l^P \simeq (1/2)^+$  state and  $D_1^\beta$  into  $s_l^P \simeq (3/2)^+$  state. So  $D_1(2420) = D_1^\beta$  in Case I and  $D_1(2420) = D_1^\alpha$  in Case II. The eigenstates  $D_1^\alpha$  and  $D_1^\beta$  are written as

$$|D_1^\alpha\rangle = \cos\Delta\phi \left| J^P = 1^+, s_l^P = \frac{1}{2}^+ \right\rangle - \sin\Delta\phi \left| J^P = 1^+, s_l^P = \frac{3}{2}^+ \right\rangle, \quad (2)$$

$$|D_1^\beta\rangle = \sin\Delta\phi \left| J^P = 1^+, s_l^P = \frac{1}{2}^+ \right\rangle + \cos\Delta\phi \left| J^P = 1^+, s_l^P = \frac{3}{2}^+ \right\rangle, \quad (3)$$

where  $\Delta\phi$  is the mixing angle and specified by

$$\tan^2(\phi_0 - \Delta\phi) = \frac{M_\beta - \bar{M}}{\bar{M} - M_\alpha}. \quad (4)$$

Here  $M_\alpha$  and  $M_\beta$  are the masses of the  $D_1^\alpha$  and  $D_1^\beta$  mesons, respectively, and  $\bar{M}$  is the average of the spin independent part of the Hamiltonian for  $L=1$  excited states given by

$$\bar{M} = \frac{5M_2 + 3(M_\alpha + M_\beta) + M_0}{12}, \quad (5)$$

$M_0$  and  $M_2$  being the masses of  $D_0^*$  and  $D_2^*$ . The mass deviations of  $M_\alpha$  and  $M_\beta$  from  $\bar{M}$  can be derived straightforwardly by using Eqs. (1)~(3).<sup>7)</sup> In Eq. (4)  $\phi_0$  is the mixing angle between  $|^1P_1\rangle$  and  $|^3P_1\rangle$  states for heavy quark mass limit given by

$$\tan\phi_0 \equiv \sqrt{\frac{1}{2}}, \quad (6)$$

and  $\Delta\phi$  is the angle indicating the deviation from the heavy quark limit.

If we consider  $m_Q \gg m_q$  in Eq. (1), since  $c_q$  is a quantity of  $1/m_q$  effects and  $c_Q, c_T$

are quantities of  $1/m_q$  effects, then

$$|c_q| \gg |c_0| \approx |c_T| \tag{7}$$

is derived when we take into account a Hamiltonian including linear confinement and Coulomb-type interactions.<sup>8)</sup> Therefore the masses of *P*-wave charmed mesons are parametrized as

$$M_2 = \bar{M} + \frac{1}{2}c_q + \frac{2}{5}c_0, \tag{8}$$

$$M_\beta = \bar{M} + \frac{1}{2}c_q - \frac{2}{3}c_0, \tag{9}$$

$$M_\alpha = \bar{M} - c_q + \frac{2}{3}c_0, \tag{10}$$

$$M_0 = \bar{M} - c_q - 2c_0. \tag{11}$$

So these lead to

$$\{M_2 - M_\beta\} : \{M_\alpha - M_0\} = 2 : 5. \tag{12}$$

Then we give the relations of the mixing angle  $\Delta\phi$  and the mass of unknown  $D_1$  by use of Eq. (4) and

$$\bar{M} = \frac{5M_2 + 8M_\alpha + 11M_\beta}{24}. \tag{13}$$

In the following calculation we treat the unknown  $D_1$  mass  $M_1$  as a parameter ( $M_1 = M_\alpha$  for Case I and  $M_1 = M_\beta$  for Case II). If the mass difference between two  $D_1$  states is too small and the right-hand side of Eq. (4) becomes negative, we obtain no solution of the mixing angle.<sup>7)</sup> Therefore we have to take  $M_1 \leq 2400$  in Case I and  $2435 \leq M_1 \leq 2460$  in Case II. Furthermore if  $M_1 < 2150$  MeV, this meson cannot decay into  $D^*\pi$ , and is stable for the strong interaction. Therefore for the unknown  $D_1$  mass we take  $2150 \leq M_1 \leq 2400$  MeV in Case I and  $2435 \leq M_1 \leq 2460$  MeV in Case II.

Relations between  $M_1$  and  $\Delta\phi$  both for Cases I and II are shown in Fig. 1. The deviation of mixing angle from heavy quark mass limit  $\Delta\phi$  almost  $0^\circ$  to  $\phi_0 \approx 35^\circ$  by varying the unknown  $D_1$  meson mass  $M_1$  from 2510 MeV to 2400 MeV for Case I and from 2460 MeV to 2436 MeV for Case II.

Next, we consider decay widths for the *P*-wave mesons. In order to extract the decay amplitude from experimental decay widths, the kinematical factors are removed by use of the following equation:

$$\Gamma = \frac{1}{8\pi M_{D^{**}}} p^{2L+1} |A|^2 |f(p)|^2 \tag{14}$$

$$= \frac{1}{8\pi M_{D^{**}}} p \tilde{\Gamma} |f(p)|^2, \tag{15}$$

where  $\Gamma$ ,  $M_{D^{**}}$  and  $f(p)$  are the decay width, the initial hadron mass and the form factor, respectively. Reduced partial decay widths  $\tilde{\Gamma}$  are given by the following

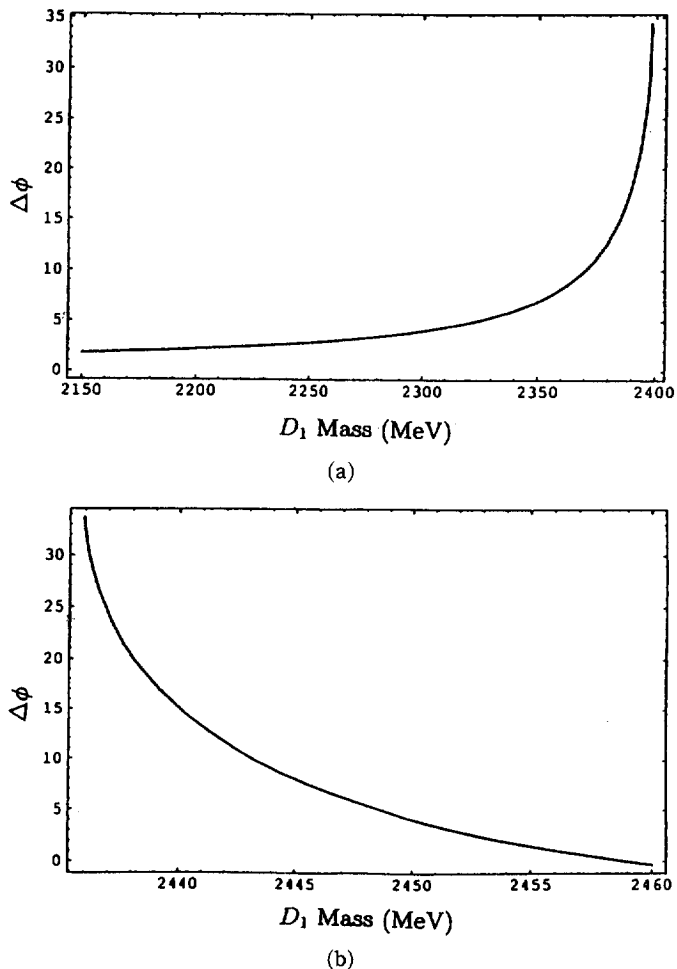

Fig. 1. Relations between the mass of unknown  $D_1$  meson and the mixing angle  $\Delta\phi$  between two  $D_1$  mesons (a) for Case I and (b) for Case II.

equations:<sup>7)</sup>

$$\tilde{\Gamma}(D_2^* \rightarrow D^* \pi) = \frac{3}{10} (p/\kappa)^4 D^2, \quad (16)$$

$$\tilde{\Gamma}(D_2^* \rightarrow D\pi) = \frac{1}{5} (p/\kappa)^4 D^2, \quad (17)$$

$$\tilde{\Gamma}(D_1^a \rightarrow D^* \pi) = \frac{1}{2} (S^2 \cos^2 \Delta\phi + (p/\kappa)^4 D^2 \sin^2 \Delta\phi), \quad (18)$$

$$\tilde{\Gamma}(D_1^b \rightarrow D^* \pi) = \frac{1}{2} (S^2 \sin^2 \Delta\phi + (p/\kappa)^4 D^2 \cos^2 \Delta\phi), \quad (19)$$

$$\tilde{\Gamma}(D_0^* \rightarrow D\pi) = \frac{1}{2} S^2, \quad (20)$$

where  $S$  and  $D$  are the reduced  $S$ - and  $D$ -wave amplitudes,  $p$  is the magnitude of three momentum of decay pion in the center of mass frame for each decay process and  $\kappa$  is a momentum scale characteristic of the decay. The coefficients are determined by the Clebsh-Gordan coefficient for each decay process. We consider the relation of the mass and decay width for the unknown  $D_1$  and  $D_1^*$  states by use of the amplitude for the  $D$ -wave decay of  $D_2^*(2460)$ .

In the following analyses, we assume the form factor of the decay vertex  $f(p)$  is a Gaussian type given by

$$f(p) = \exp\left(-\frac{p^2}{2a^2}\right), \tag{21}$$

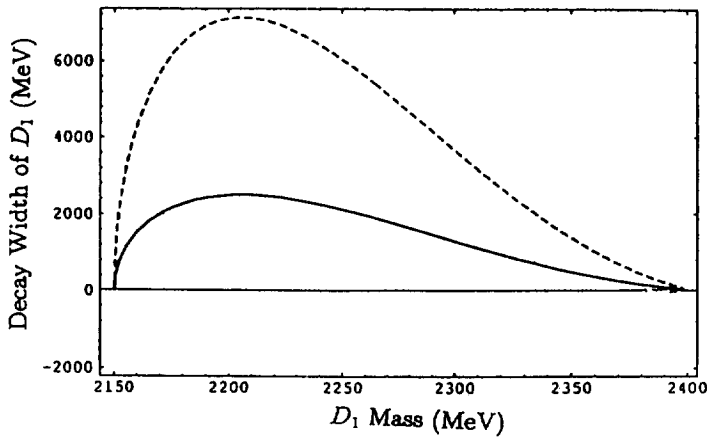

(a)

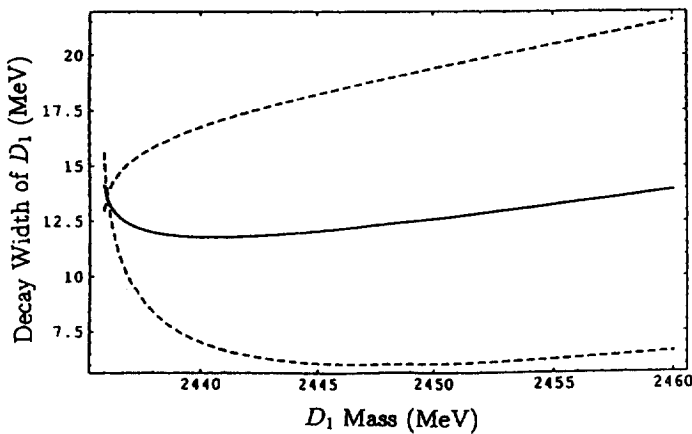

(b)

Fig. 2. Relations between the mass and decay width of unknown  $D_1$  (a) for Case I and (b) for Case II. Solid lines show results obtained from experimental central values of the  $D_2^*(2460)$  and  $D_1(2420)$  decay widths. Dashed lines show experimental uncertainties.

where  $a$  is a parameter with the dimension of the mass.\*) The parameter  $a$  is determined so as to reproduce the  $D$ -wave decay ratio,

$$\frac{\tilde{\Gamma}([D_2^* \rightarrow D\pi]_D)}{\tilde{\Gamma}([D_2^* \rightarrow D^*\pi]_D)} = \frac{2}{3} \quad (22)$$

which is derived from Eqs. (16) and (17). From the experimental value of the ratio of  $D_2^*(2460)$  decay  $\Gamma(D_2^* \rightarrow D\pi)/\Gamma(D_2^* \rightarrow D^*\pi) = 2.2 \pm 0.7 \pm 0.6$ , we obtain  $a = 2.0$  GeV. Although we use this value of  $a$ , the ratio of two amplitudes Eq. (22) is insensitive for the value of  $a$ .

We use the reduced  $D$ -wave amplitude  $D/\kappa^2$  obtained from Eq. (16) and the

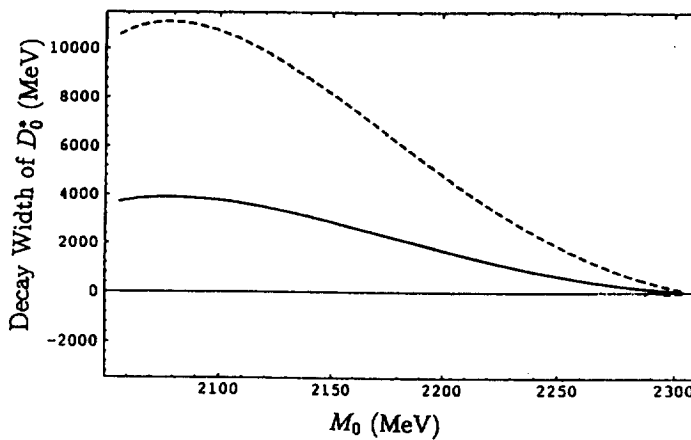

(a)

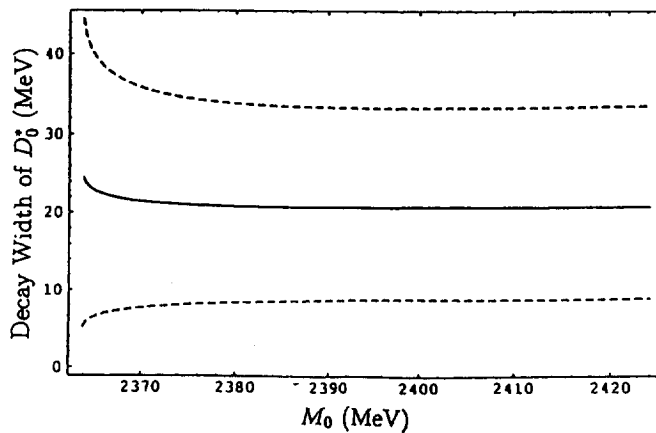

(b)

Fig. 3. Relations between mass and decay width of unknown  $D_0^*$  state (a) for Case I and (b) for Case II. Solid lines and dashed lines denote the same as in Fig. 2.

\*) There is ambiguity of function form of the form factor. It may also be possible to take  $f(p) = (p^2/a^2) \exp(-p^2/2a^2)$  for the  $D$ -wave decay form factor according to Ref. 9). However, the difference may be absorbed into the parameter  $a$  and the effect of ambiguity of form factor does not affect the analyses in this paper.

experimental value of  $\Gamma(D_2^*(2460) \rightarrow D^*\pi)$ . In Case I where  $D_1(2420)$  is assigned to the  $D_1^0$  state, we can determine the reduced *S*-wave decay amplitude by use of Eq. (19),

$$S^2 = \frac{1}{\sin^2 \Delta\phi} \left[ \frac{16\pi M_{D_1(2420)}}{p|f(p)|^2} \Gamma(D_1(2420) \rightarrow D^*\pi) - \left(\frac{p}{\kappa}\right)^4 D^2 \cos^2 \Delta\phi \right], \quad (23)$$

where

$$\Delta\phi = \phi_0 - \tan^{-1} \sqrt{\frac{M_{D_1(2420)} - \bar{M}}{\bar{M} - M_{D_1}}}. \quad (24)$$

The reduced decay width of the unknown  $D_1$  is given by Eq. (18) in Case I. Calculated results for the decay width and mass of the unknown  $D_1$  are shown in Fig. 2(a). The solid line shown in Fig. 2(a) is obtained from experimental central values of the decay widths of  $D_2^*(2460)$  and  $D_1(2420)$ . Dashed lines show the upper bound due to the experimental uncertainties. Though the experimental error is rather large and almost zero decay width for the unknown  $D_1$  meson is not rejected, the decay width is expected very large in Case I.

In Case II the reduced decay width of the unknown  $D_1$  is given by Eq. (19). In Fig. 2(b) we show the relation between the mass and decay width of unknown  $D_1$  for Case II. In this case the expected decay width lies between 6 and 20 MeV almost independent of unknown  $D_1$  mass.

We obtained the reduced *S*-wave decay amplitude in Eq. (23) in Case I. By use of this *S*-wave amplitude we calculate the mass and decay width of  $D_0^*$  meson which are shown in Fig. 3(a) for Case I. By a similar method we calculate the *S*-wave amplitude in Case II and obtain the relation between mass and decay width of the  $D_0^*$  meson. The results for the  $D_0^*$  meson in Case II are shown also in Fig. 3(b). The decay width of  $D_0^*$  meson is expected to be very large in Case I, while about 20 MeV irrespective of its mass in Case II.

### § 3. Angular distribution of two decay pions from $D_1(2420)$

Since  $D_1(2420)$  decays into  $D^*\pi$  and  $D^*$  decays successively into  $D\pi$  through the strong interactions, the final states of  $D_1(2420)$  are  $D\pi\pi$ . Recently the angular distribution of the final two decay pions from the  $D_1(2420)$  was measured by E687 Collaboration.<sup>6)</sup> This experiment gives the important information for the mixing of *S*- and *D*-wave decay amplitudes. The angular distribution of pions at  $\theta$  which is the angle between directions of two pions in the  $D^*$  rest frame is given by

$$\frac{1}{N} \frac{dN}{d\cos\theta} = \frac{1}{2} \left( R + (1-R) \frac{1+3\cos^2\theta}{2} + \sqrt{2R(1-R)} \cos\varphi (1-3\cos^2\theta) \right), \quad (25)$$

where  $\varphi$  is the relative phase between the *S*- and *D*-wave amplitudes. In Eq. (25)  $R = \Gamma_s/\Gamma$  and  $\Gamma_s$  is the *S*-wave contribution to the total decay width  $\Gamma$ . Then  $R = S^2 \sin^2 \Delta\phi / 2\bar{\Gamma}$  in Case I and  $R = S^2 \cos^2 \Delta\phi / 2\bar{\Gamma}$  in Case II.

The distribution function in the form of  $A(1+B\cos^2\theta)$  is fitted to the angular distribution of decay pions from the neutral  $D_1(2420)$  measured by E687 Collaboration. The result is  $B = 2.74 \pm 0.33$ .<sup>5)</sup> If  $D_1(2420)$  is the pure eigenstate with  $s^P = (3/2)^+$  or with

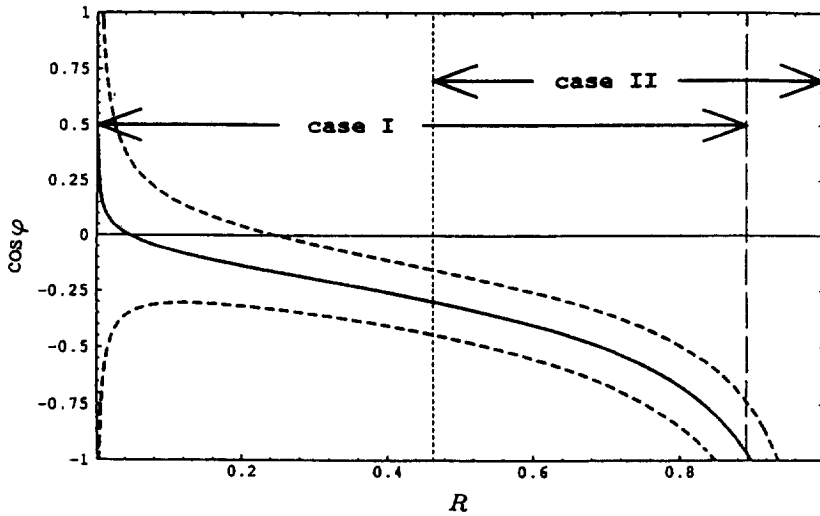

Fig. 4. Allowed area of the  $S$ -wave contribution to the  $D_1(2420)$  decay width, denoted as  $R$ , and the relative phase  $\varphi$  of between the  $S$ - and  $D$ -wave decay amplitudes of  $D_1(2420)$  meson. The experimental limits of  $R$  are shown for Cases I and II.

$s_i^P = (1/2)^+$ ,  $B=3$  or  $0$ , respectively. From this result the value  $B$  is consistent with the pure  $D$ -wave decay of  $D_1(2420)$ . Then one may conclude that  $D_1(2420)$  belongs to the  $s_i^P \simeq (3/2)^+$  state. However if we include the effects of relative phase between the  $S$ - and  $D$ -wave decay amplitudes there remains a possibility that  $D_1(2420)$  belongs to the  $s_i^P \simeq (1/2)^+$  doublet. The relation between the relative phase  $\varphi$  and the  $S$ -wave contribution  $R$  is given by

$$\cos \varphi = \frac{C - R}{2\sqrt{2R(1-R)}}, \quad (26)$$

where  $C = (3 - B)/(3 + B)$ . In Fig. 4 we show the plot of  $R$  versus  $\cos \varphi$  by using the experimental  $B$ . The area between the two dashed lines is the allowed region determined by the E687 experiment.

The allowed region of  $R$  is also restricted from both the unknown  $D_1$  mass and the decay width of  $D_1(2420)$ . For Cases I and II, we obtain the allowed regions for solutions from these constraints,

$$0 \leq R \leq 0.893 \quad (\text{Case I}) \quad (27)$$

$$0.464 \leq R \leq 1.0 \quad (\text{Case II}) \quad (28)$$

which are shown in Fig. 4.

As is seen from this result the E687 experiment does not reject the possibility that  $D_1(2420)$  is a member of  $s_i^P \simeq (1/2)^+$  doublet, though the possibility to belong to  $s_i^P \simeq (3/2)^+$  is much higher than to  $s_i^P \simeq (1/2)^+$ .



#### § 4. Summary and discussion

In the preceding sections we studied the spectroscopy of  $P$ -wave charmed mesons from the Breit-Fermi Hamiltonian given in § 2. The two  $1^+$  states mixing, the masses and decay widths of unfound  $D_1$  and  $D_0^*$  are evaluated. It is believed usually that the mixing angle will be small in the charmed mesons. In Case I where the  $D_1(2420)$  meson belongs to  $s_l^P=(3/2)^+$  dominant states, the decay widths of unknown  $D_1$  and  $D_0^*$  are expected to be very large though the experimental uncertainties are rather large. The large decay widths of these mesons come from the very large  $S$ -wave amplitude which is needed to reproduce the experimental ratio  $\Gamma(D_2^* \rightarrow D\pi)/\Gamma(D_2^* \rightarrow D^*\pi)=2.2 \pm 0.7 \pm 0.6$ . The large decay widths may be the reason why these mesons are not discovered yet by experiments. On the other hand, in Case II, where  $D_1(2420)$  is a member of the  $s_l^P=(1/2)^+$  dominant doublet, the decay widths of unknown  $D_0^*$  and  $D_1$  become small then these mesons will be easily observed by experiments.

We also analyzed the experimental angular distribution of final two pions of the  $D_1(2420)$  decay by E687 Collaboration. Our results are that the possibility that  $D_1(2420)$  belongs to a member of the  $s_l^P=(3/2)^+$  dominant doublet is much higher than the possibility that  $D_1(2420)$  belongs to  $s_l^P=(1/2)^+$  dominant doublet, but the latter case is not completely rejected.

We are eager for further experiments to decide the spectroscopy of the  $P$ -wave charmed mesons including the  $D_1(2420)$  more clearly and decay widths.

#### References

- 1) N. Isgur and M. B. Wise, Phys. Lett. **B232** (1989), 113; **B237** (1990), 527.
- 2) M. Neubert, Phys. Rep. **245** (1994), 259.
- 3) T. Mannel, W. Robert and Z. Ryzak, Phys. Lett. **B254** (1990), 274; **B259** (1991), 359.
- 4) M. Neubert, Phys. Lett. **B264** (1991), 455.
- 5) CLEO Collaboration, P. Avery et al., Phys. Lett. **B331** (1994), 236.
- 6) E687 Collaboration, P. L. Frabetti et al., Phys. Rev. Lett. **72** (1994), 324.
- 7) J. L. Rosner, Comment Nucl. Part. Phys. **16** (1986), 109.
- 8) S. Godfrey and N. Isgur, Phys. Rev. **D32** (1985), 189.  
H. J. Schnitzer, Phys. Rev. **D18** (1978), 3482.
- 9) N. Isgur, D. Scora, B. Grinstein and M. B. Wise, Phys. Rev. **D39** (1989), 799.  
T. B. Suzuki, T. Ito, S. Sawada and M. Matsuda, Prog. Theor. Phys. **91** (1994), 757.
- 10) N. Isgur and M. B. Wise, Phys. Rev. Lett. **66** (1991), 1130.
